# Supplementary material for: Sulfur poisoning and NH3 regeneration of Pt/Al2O3: oxidations of SO2, NH3, NO and C3H6 as probe reactions
Source: Royal Society of Chemistry journal article supplement (doi:10.1039/d3cy01593a), 2024-01-01
Supplement: d3cy01593a1.pdf [file d3cy01593a1.pdf]

## Supplementary Information

### Sulfur Poisoning and NH<sub>3</sub> Regeneration of Pt/Al<sub>2</sub>O<sub>3</sub>: Oxidations of SO<sub>2</sub>, NH<sub>3</sub>, NO and C<sub>3</sub>H<sub>6</sub> as Probe Reactions

Chenhao Fang and Michael P. Harold\*

*William A. Brookshire Department of Chemical & Biomolecular Engineering,  
University of Houston, Houston, Texas 77204, (USA),*

*\*Corresponding author e-mail: [mpharold@central.uh.edu](mailto:mpharold@central.uh.edu)*

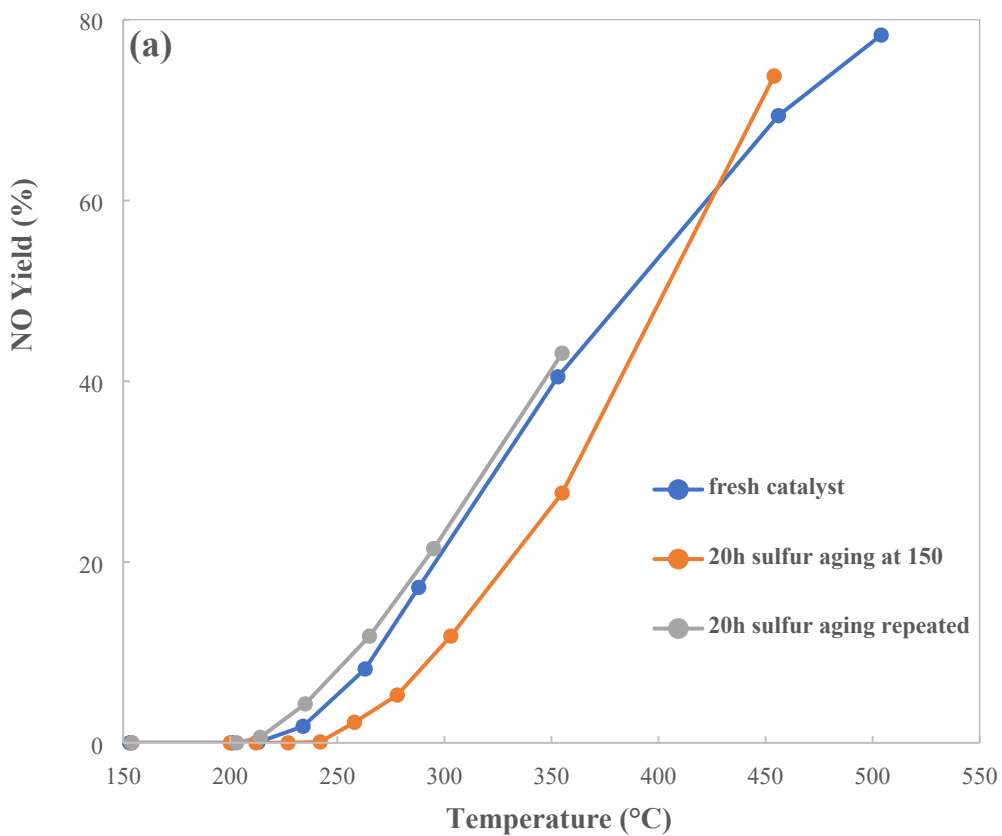

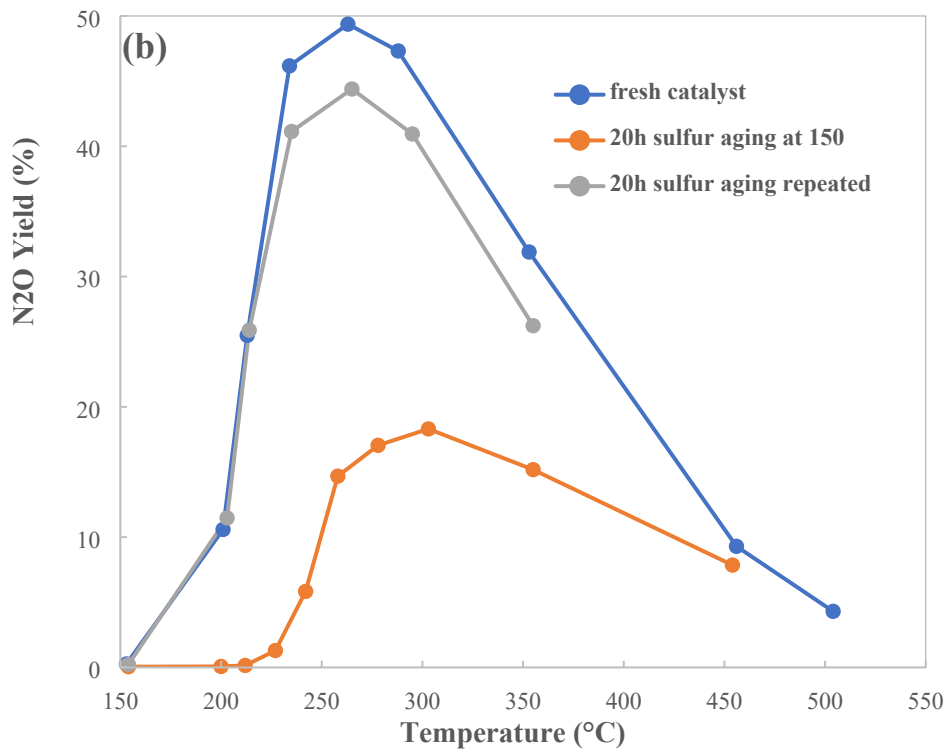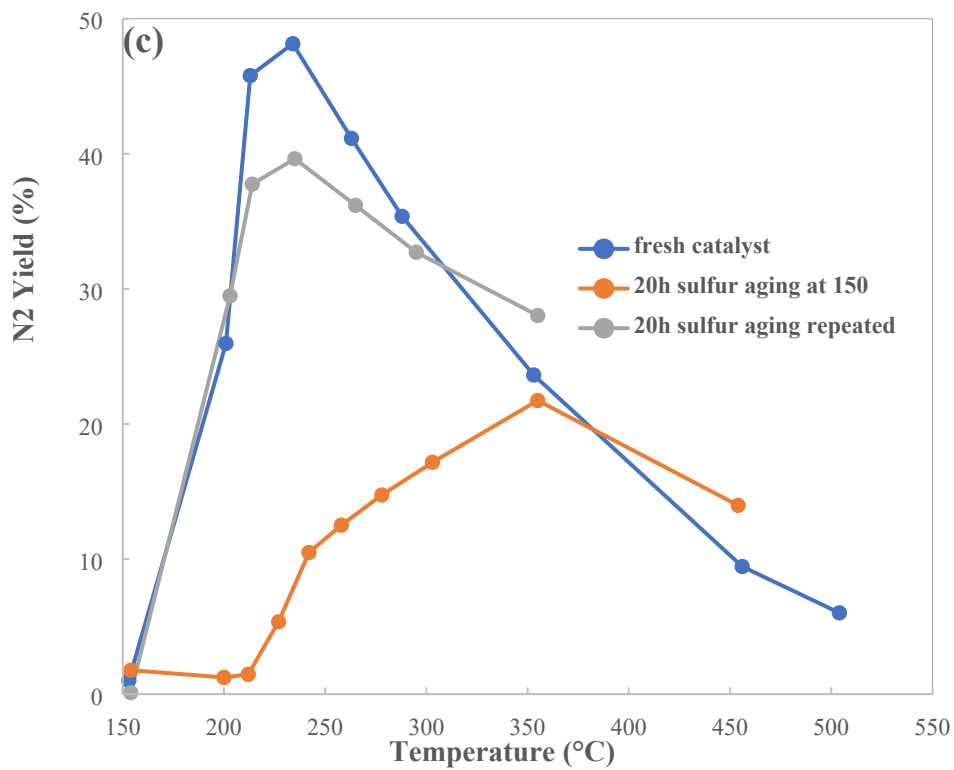

Fig. S1 Steady-state (a) NO yield, (b) N<sub>2</sub>O yield, (c) N<sub>2</sub> yield over fresh and poisoned Pt/Al<sub>2</sub>O<sub>3</sub> catalyst.

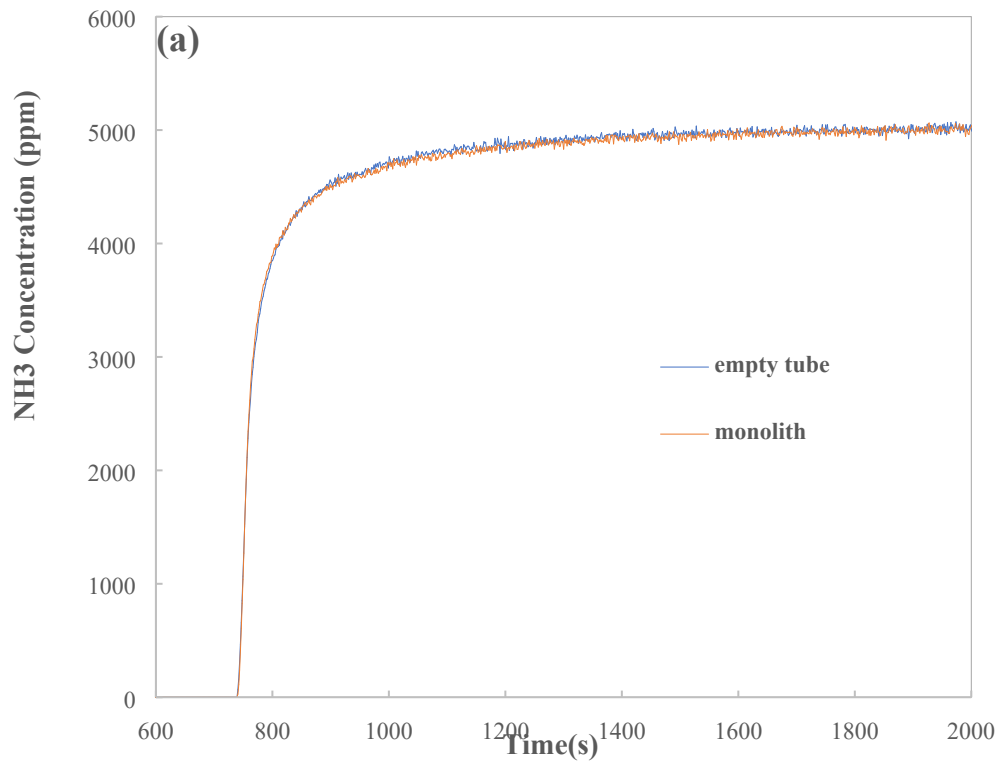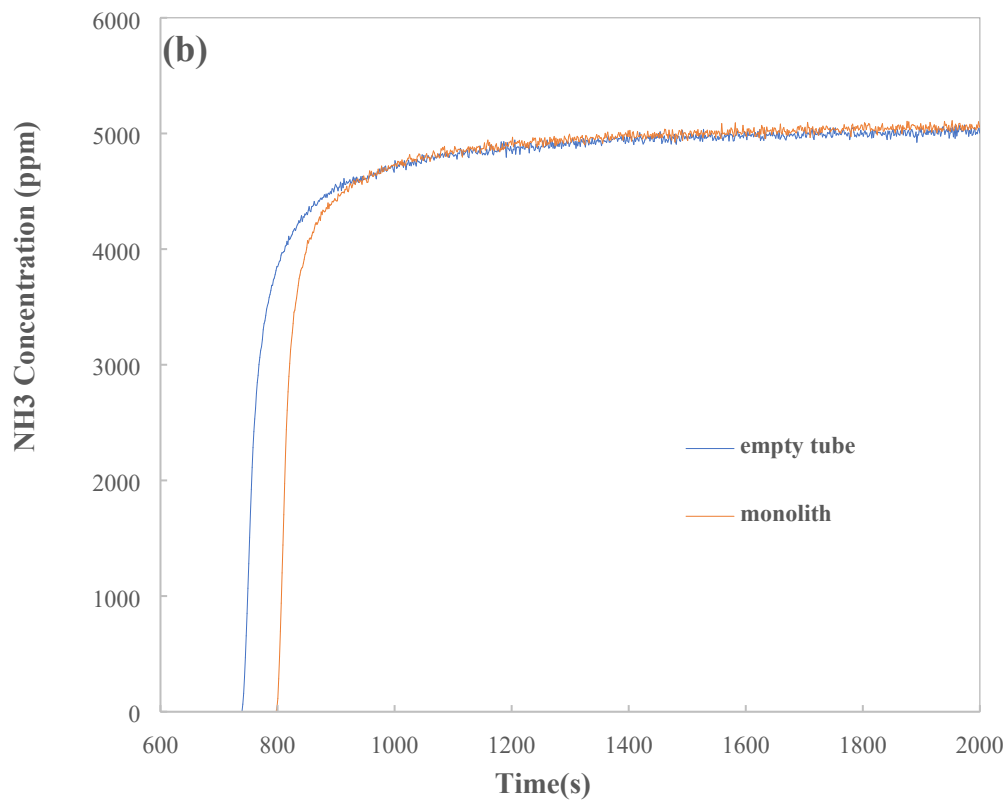

Fig. S2 NH<sub>3</sub> adsorption profiles collected for NH<sub>3</sub>-TPD (a) and SO<sub>x</sub> + NH<sub>3</sub> sequential TPD (b).

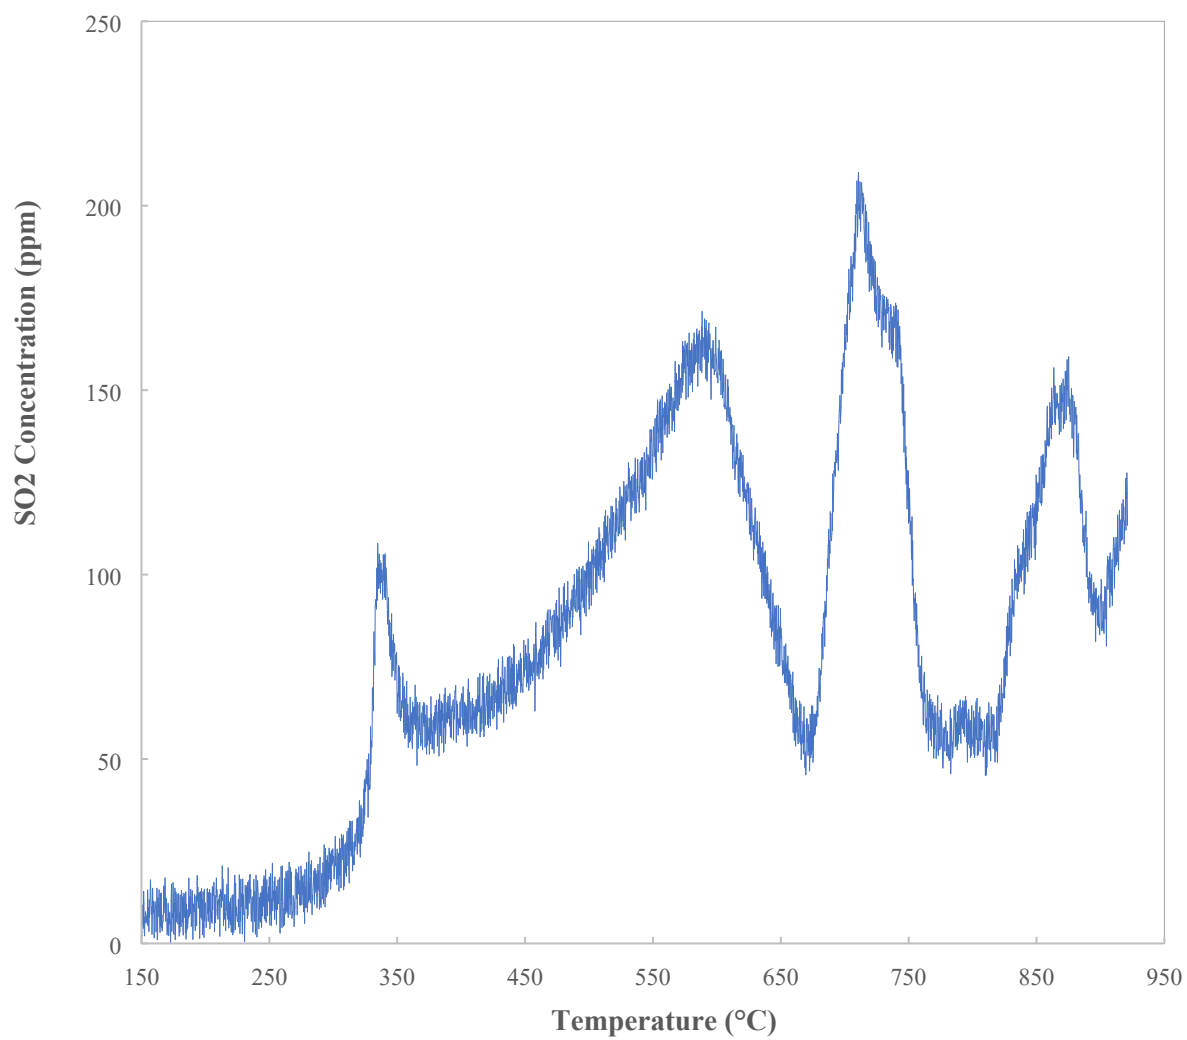

Fig. S3 SO<sub>2</sub> TPD profiles collected after exposing a SO<sub>x</sub> saturated Pt/Al<sub>2</sub>O<sub>3</sub> sample to 5000ppm NH<sub>3</sub> + 10% O<sub>2</sub> at the ramping rate of 10°C/min in NH<sub>3</sub> + Ar.

**Table S1 Amount of NH<sub>3</sub> and SO<sub>2</sub> released during SO<sub>x</sub> + NH<sub>3</sub> sequential TPD in Ar**

| <b>Experiment</b>                                     | <b>NH<sub>3</sub> desorbed<br/>(μmoles)</b> | <b>SO<sub>2</sub> desorbed at lower<br/>temperature (μmoles)</b> | <b>SO<sub>2</sub> desorbed at higher<br/>temperature (μmoles)</b> |
|-------------------------------------------------------|---------------------------------------------|------------------------------------------------------------------|-------------------------------------------------------------------|
| <b>SO<sub>x</sub> + NH<sub>3</sub> sequential TPD</b> | 3.0                                         | 1.7                                                              | 15.3                                                              |
